# Supplementary material for: The role of sex in the innate and adaptive immune environment of metastatic colorectal cancer
Source: PubMed Central journal article supplement (PMC7435180; doi:10.1038/s41416-020-0913-8), 2020-05-26
Supplement: 41416_2020_913_MOESM1_ESM.pdf [file 41416_2020_913_MOESM1_ESM.pdf]

1 Supplemental Figure Legends

2 **Supplementary Figure 1.** FCA gating strategy to identify viable T cells. A)

3 All samples were singlet-gated by forward scatter for roundness to  
4 exclude debris. Then cells B) were gated on size. Splenocyte populations  
5 were used to create gates for expected sizes of lymphocytes, with the  
6 same gate shared between spleen, peritoneal wash, and dissociated  
7 tumor cells (from left to right). There was low prevalence (2-5%) of cells  
8 with immune markers outside these gates and marker positive cells  
9 were frequently positive for multiple contradictory markers (i.e.  
10 CD4+CD8+) or were gated under live/dead discrimination and  
11 considered likely autofluorescent. C) Cells were gated on viability using  
12 TonboBio GhostDye. D) Representative CD4 vs CD8 plots of cells gated  
13 for size and viability from splenocytes, peritoneal wash, and dissociated  
14 tumor from male and female tumor-bearing mice are shown. E) CD8+  
15 and CD4+ cells were verified to be CD3+.

16 **Supplementary Figure 2.** Ki67+ cells within tumors do not differ with  
17 sex. Tumors stained for Ki67 by IHC were then quantified using Celleste  
18 software for positive populations in non-necrotic portions of tumor  
19 tissue. A) Representative 20x picture of portions of tumor from female  
20 and male mice. B) Image analysis by Celleste counted Ki67+ populations  
21 and showed no difference in Ki67 staining between tumors from males  
22 and females. n=9-13.

23 **Supplementary Figure 3.** Sex-associated differences in T cell  
24 transcription factors. Colon adenocarcinoma and normal tissue data  
25 were acquired from TCGA, and stratified by sex. A) GATA3 mRNA was  
26 increased in tumor tissues from women, while B) Tbet mRNA decreased  
27 in tumor tissues from men, compared to normal tissue from the same  
28 sex. \* =  $p < 0.050$ , n=124-184

29 Supplemental Methods

30 **Animal Husbandry**

31 Mice were obtained directly from The Jackson Laboratory. Mice were  
32 housed in specific-pathogen free facilities, that met guidelines  
33 recommended by the U.S. National Research Council for the care of  
34 research animals, including climate control for temperature and  
35 humidity and an automated day/night cycle. Cages contained 2-5  
36 littermates of the same sex, nesting material, 1-2 enrichment items, and  
37 free access to food and water. Corncob bedding was used.

38 Mice were kept in cages with access to enrichment and a least one  
39 same-sex littermate in climate-controlled SPF facilities. The mean  
40 weight at the beginning of the study was 16.2g for females and 21.3g  
41 for males,  $\pm$ <5%.

42 Animals were euthanized with CO<sub>2</sub>, per AVMA guidelines to minimize  
43 distress.

44 **Ki67 Staining**

45 Intraperitoneal tumors were harvested from male and female C57BL/6J  
46 mice, processed for immunohistochemistry, and stained with rabbit  
47 anti-Ki67 (ab16667, Abcam, Cambridge, MA, USA).

48 Sections for Ki67 were processed for immunohistochemistry using the  
49 ImmPRESS™ VR Horse Anti Rabbit IgG HRP Polymer kit (cat# MP-6401,  
50 Vector Labs, Inc., Burlingame, CA). Antigen retrieval (pH 6 Citrate

51 Antigen Unmasking Solution, cat# H3300, Vector Labs, Burlingame, CA)  
52 was accomplished via twenty minutes in a steamer followed by thirty  
53 minutes cooling at room temperature. Sections were treated with a  
54 peroxidase blocking reagent (Bloxall, cat# SP-6000, Vector Laboratories,  
55 Inc, Burlingame, CA) to inhibit endogenous peroxidase activity, followed  
56 by 2.5% normal horse serum to block nonspecific staining. Rabbit anti  
57 Ki67 (abcam, cat#16667, 1:200 dilution, Cambridge, MA) was applied to  
58 each section and following incubation overnight at 4°C in a humidified  
59 chamber, sections were washed in TBS and the ImmPRESS Polymer  
60 reagent was applied according to the manufacturer's direction.

61 Slides were incubated with NovaRed® ( Vector Laboratories, Inc.,  
62 Burlingame, CA) chromogen for visualization. Counterstaining was  
63 carried out with Methyl Green (Vector laboratories, Burlingame, CA).  
64 Appropriate positive and negative tissue controls were used.

65 Samples were imaged on an EVOS M7000 in the transmitted light  
66 channel using an EVOS 10x objective (Thermo Fisher Scientific,  
67 Waltham, MA, USA) and an Olympus 20x objective (Olympus, Tokyo,  
68 Japan). Quantitative analysis on the acquired tissue images was  
69 performed using the Smart Segmentation and Count features of Celleste  
70 Image Analysis software, version 4.1.1 (Thermo Fisher Scientific,  
71 Waltham, MA, USA). Cell nuclei in non-necrotic areas that were  
72 positively and uniformly stained were quantified as either Ki67 positive  
73 or negative based on stain intensity features using Smart Segmentation.  
74 The morphological watershed algorithm in the Count feature was used

75 to segment any clustered nuclei. Representative images were color-  
76 corrected slightly to adjust for camera color bias.

### 77 **mRNA Datasets, Visualization and Statistical Analyses**

78 The RNA-seq datasets and protein expression data for 131 proteins for  
79 colon adenocarcinoma (COAD) were downloaded from the University of  
80 California, Santa Cruz (UCSC) Cancer Genome Browser  
81 (xenabrowser.net). Only publicly available, deidentified data were  
82 accessed from TCGA for the analyses reported here. Basic  
83 characteristics of the patients used in the survival analyses are provided  
84 in Supplementary Table S1. The RNA-seq datasets for colon normal  
85 tissues (184 males vs. 124 females) from Genotyping-Tissue Expression  
86 (GTEx) were also downloaded from USCS browser. Basic statistical  
87 analyses and visualization were performed using R v3.6.1. Kaplan–Meier  
88 for patient survival were performed and visualized using the survival  
89 and survminer packages in R. For nonparametric comparisons, the  
90 Wilcox test was used,  $p < 0.05$  was considered to be statistically  
91 significant.

92 **Table S1. Clinical patient characteristics for the colon cancer**

| <b>Characteristics</b>     | <b>N</b> | <b>OS</b>                         |
|----------------------------|----------|-----------------------------------|
| <b>Age (year)</b>          | 65       | HR = 0.69(0.42   1.1) P = 0.154   |
| >65                        | 161      |                                   |
| <65                        | 125      |                                   |
| <b>Gender</b>              |          | HR = 1.4(0.88   2.3) P = 0.152    |
| Male                       | 154      |                                   |
| Female                     | 134      |                                   |
| <b>Disease Stage*</b>      |          |                                   |
| Stage I                    | 44       |                                   |
| Stage II (vs. Stage I)     | 110      | HR = 2.1 (0.63   7.2) P = 0.22    |
| Stage III (vs. Stage I)    | 82       | HR = 3.7 (1.12   12.5) P = 0.032* |
| Stage IV (vs. Stage I)     | 40       | HR = 9.3(2.76   31.6) P < 0.0001* |
| <b>Stage T*</b>            |          |                                   |
| Stage I+II                 | 50       |                                   |
| Stage III (vs. Stage I+II) | 196      | HR = 1.9 (0.77   4.9) P = 0.162   |
| Stage IV (vs. Stage I+II)  | 40       | HR = 7.6 (2.77   20.6) P < 0.001* |
| <b>Nodal Invasion*</b>     |          |                                   |
| N0                         | 166      |                                   |
| N1 (vs. N0)                | 71       | HR = 2.1 (1.2   3.7) P = 0.01*    |
| N2 (vs. N0)                | 49       | HR = 3.4 (1.7   6.0) P < 0.001*   |
| <b>Distant Metastases*</b> |          |                                   |
| M0                         | 193      |                                   |
| M1 (vs.M0)                 | 40       | HR = 4.3(2.4   7.5) P < 0.001*    |
| MX                         | 49       |                                   |
| <b>Tumor Site</b>          |          |                                   |
| Left                       | 104      | HR = 1.4(0.82   2.3) P = 0.221    |
| Right                      | 181      |                                   |

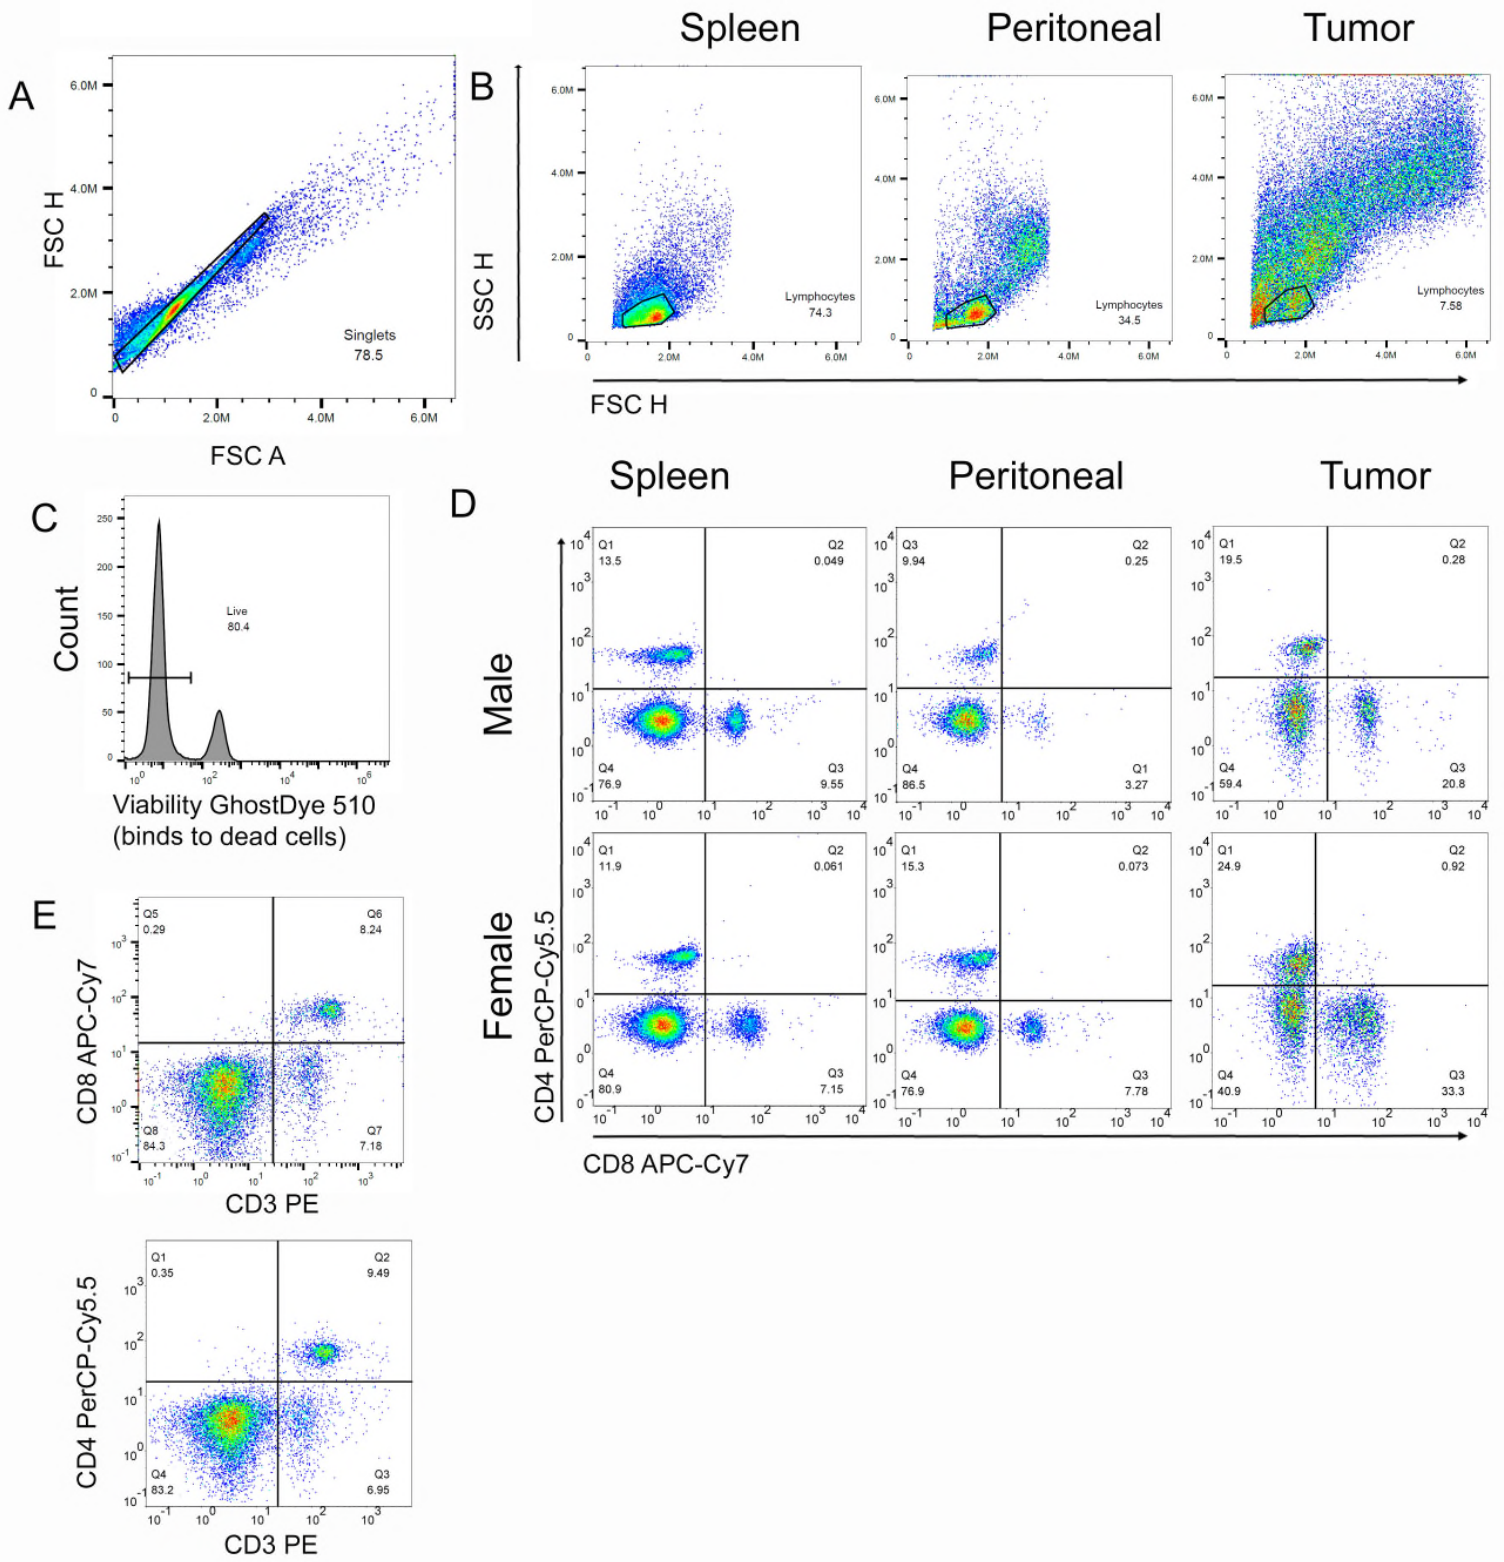

Supplemental Figure 1

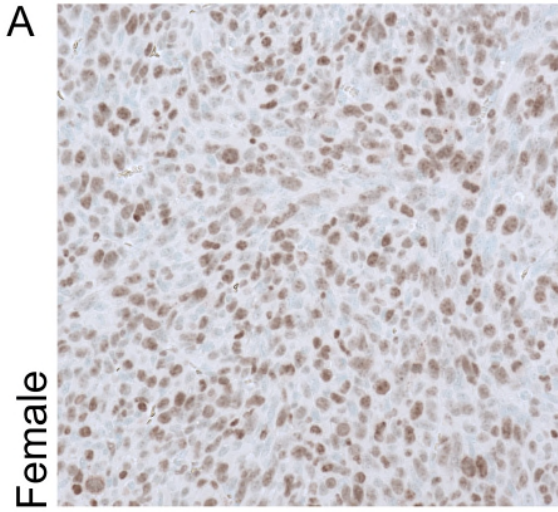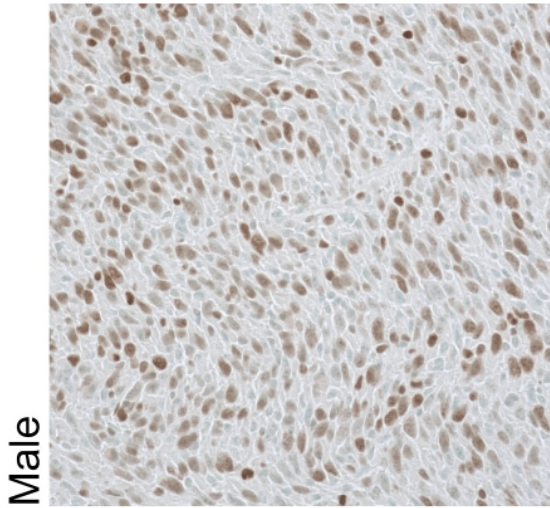

**B** Tumor Ki67 in tumors from males and females

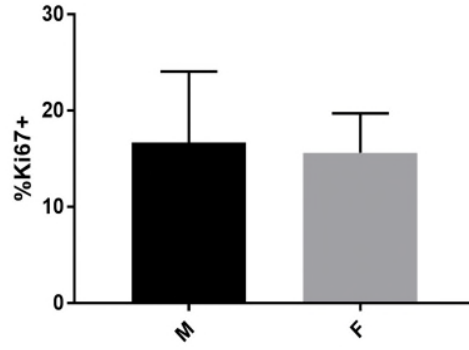



**A**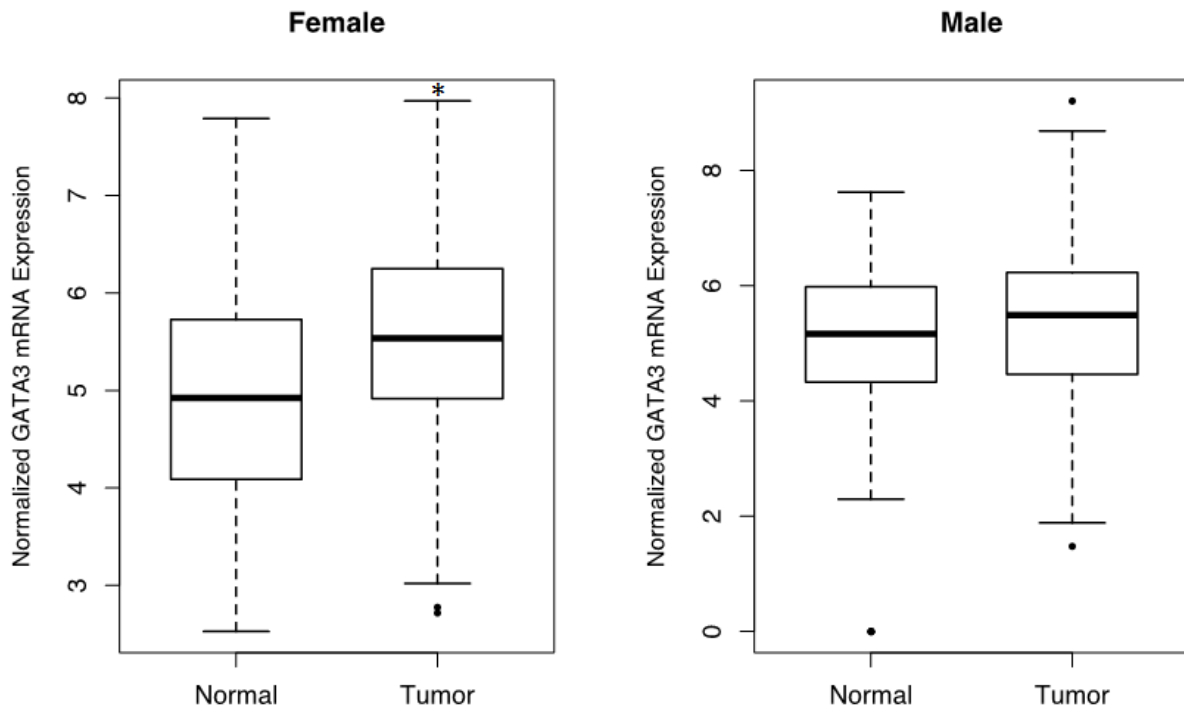**B**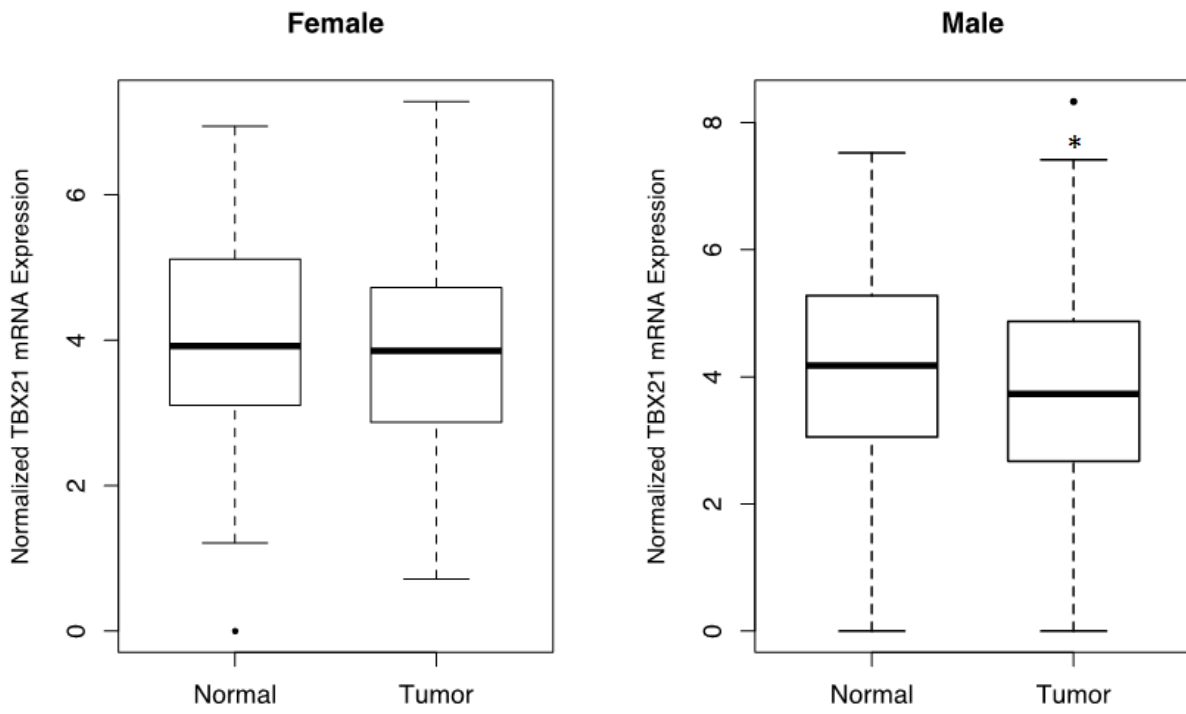

Supplemental Figure 3
